# Supplementary material for: The role of conjunctive representations in prioritizing and selecting planned actions
Source: eLife journal article supplement (doi:10.7554/elife.80153), 2022-10-31
Supplement: supp [file elife-80153-supp-v1.zip]

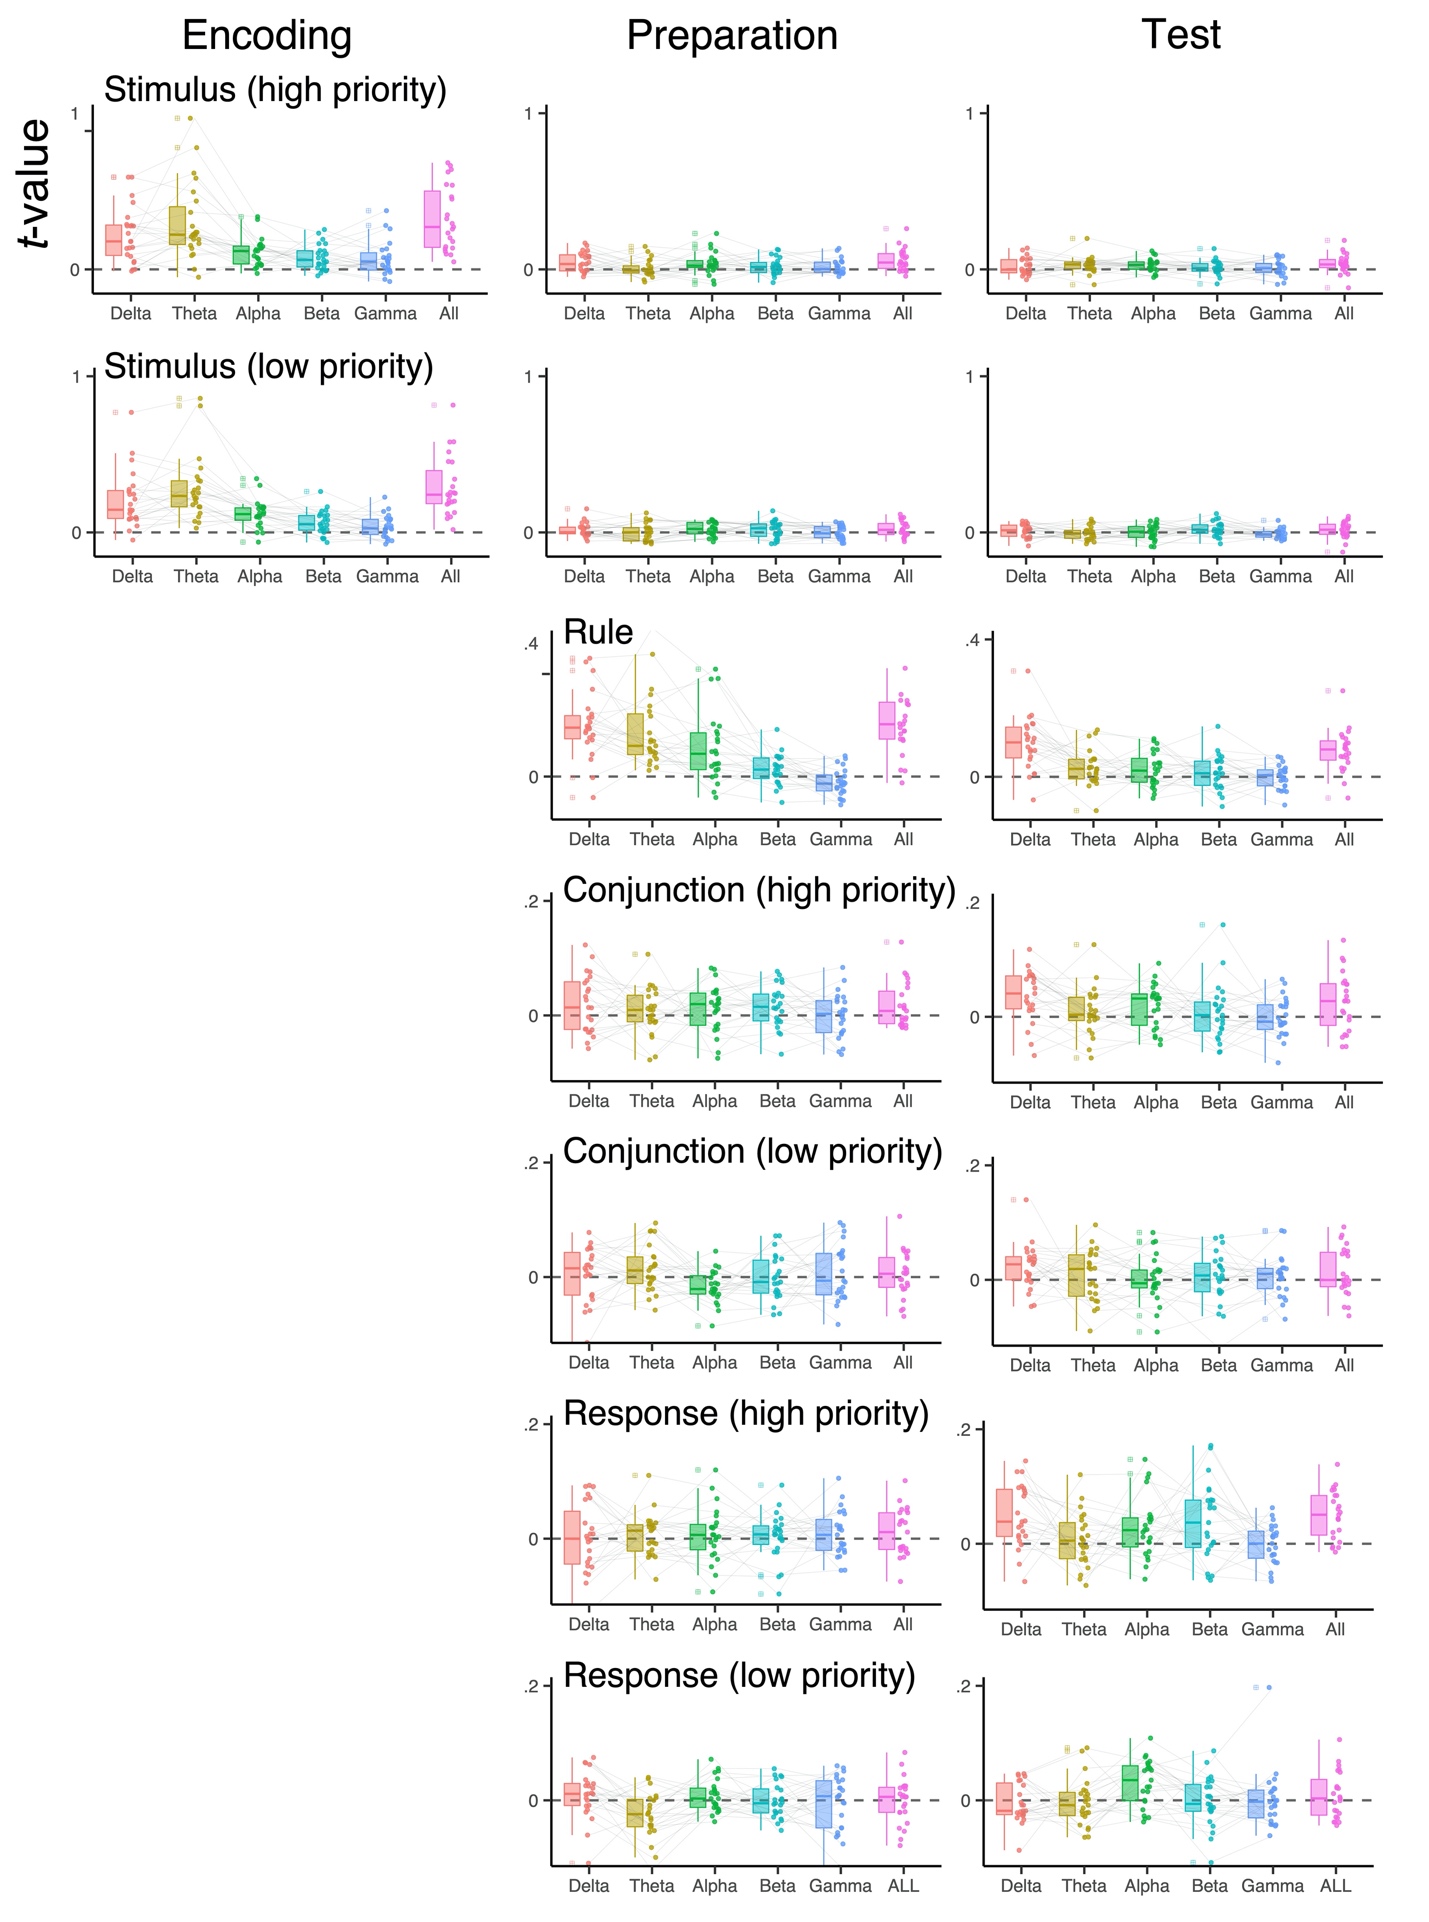


**Decoded representations of two actions using frequency-specific scalp-topography**

**Figure 1 - figure supplement 1**

The RSA scores of individual subjects using EEG signals in specific frequency ranges (1-3 Hz for the delta-band, 4-7 *Hz* for the theta-band, 8-12 *Hz* for the alpha- band, 13-30 for the beta-band, 31-35 *Hz* for the gamma-band, and 1-35 *Hz* for all). EEG signals were averaged over encoding (0 to 750 ms), maintenance (750 to 1500 ms) selection (1500 to 220 ms) time intervals before decoding analysis.
