# Supplementary material for: The role of conjunctive representations in prioritizing and selecting planned actions
Source: eLife journal article supplement (doi:10.7554/elife.80153), 2022-10-31
Supplement: supp [file elife_poa_e80153_Figure_4_figure_supplement_1.docx]

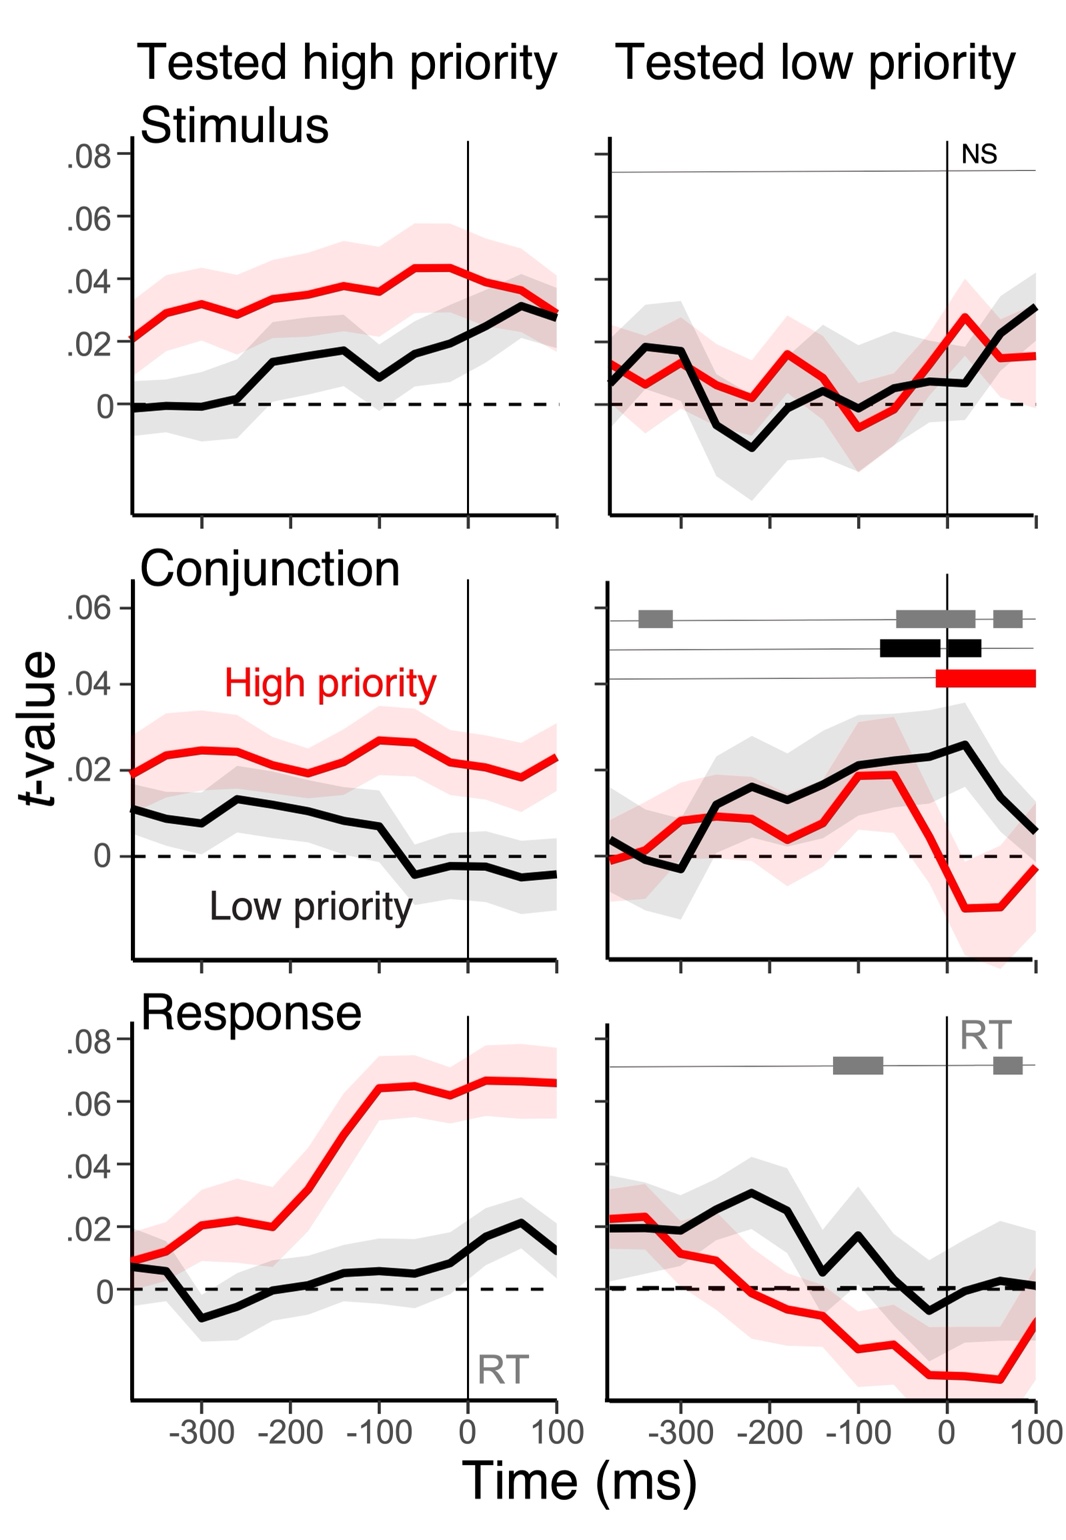


**Modulation of action representations during selection** **using response-aligned EEG**

**Figure 4­ - figure supplement 1**

Average, single-trial *t*-values associated with the stimulus, conjunction and response derived from the RSA, separately for high priority (red) action and low priority action (black). The left panels show RSA scores when the high priority action was tested, whereas the right panels show the result for the low priority action. Shaded regions specify the within-subject standard errors. On the right side panels, the gray bars at the top show clusters with a significant interaction effect between the priority and the test type of actions, the black bars indicate the difference in low priority conjunctions in each test context, and the red bars indicate the difference in high priority conjunctions in each text context (cluster-forming threshold, *p*  < .05).
